# Supplementary material for: Widespread anti-CRISPR proteins in virulent bacteriophages inhibit a range of Cas9 proteins
Source: PubMed Central journal article supplement (PMC6060171; doi:10.1038/s41467-018-05092-w), 2018-07-25
Supplement: 41467_2018_5092_MOESM1_ESM.pdf [file 41467_2018_5092_MOESM1_ESM.pdf]

**Widespread anti-CRISPR proteins in virulent bacteriophages inhibit  
a range of Cas9 proteins**

Hynes et al.

**Supplementary Information**

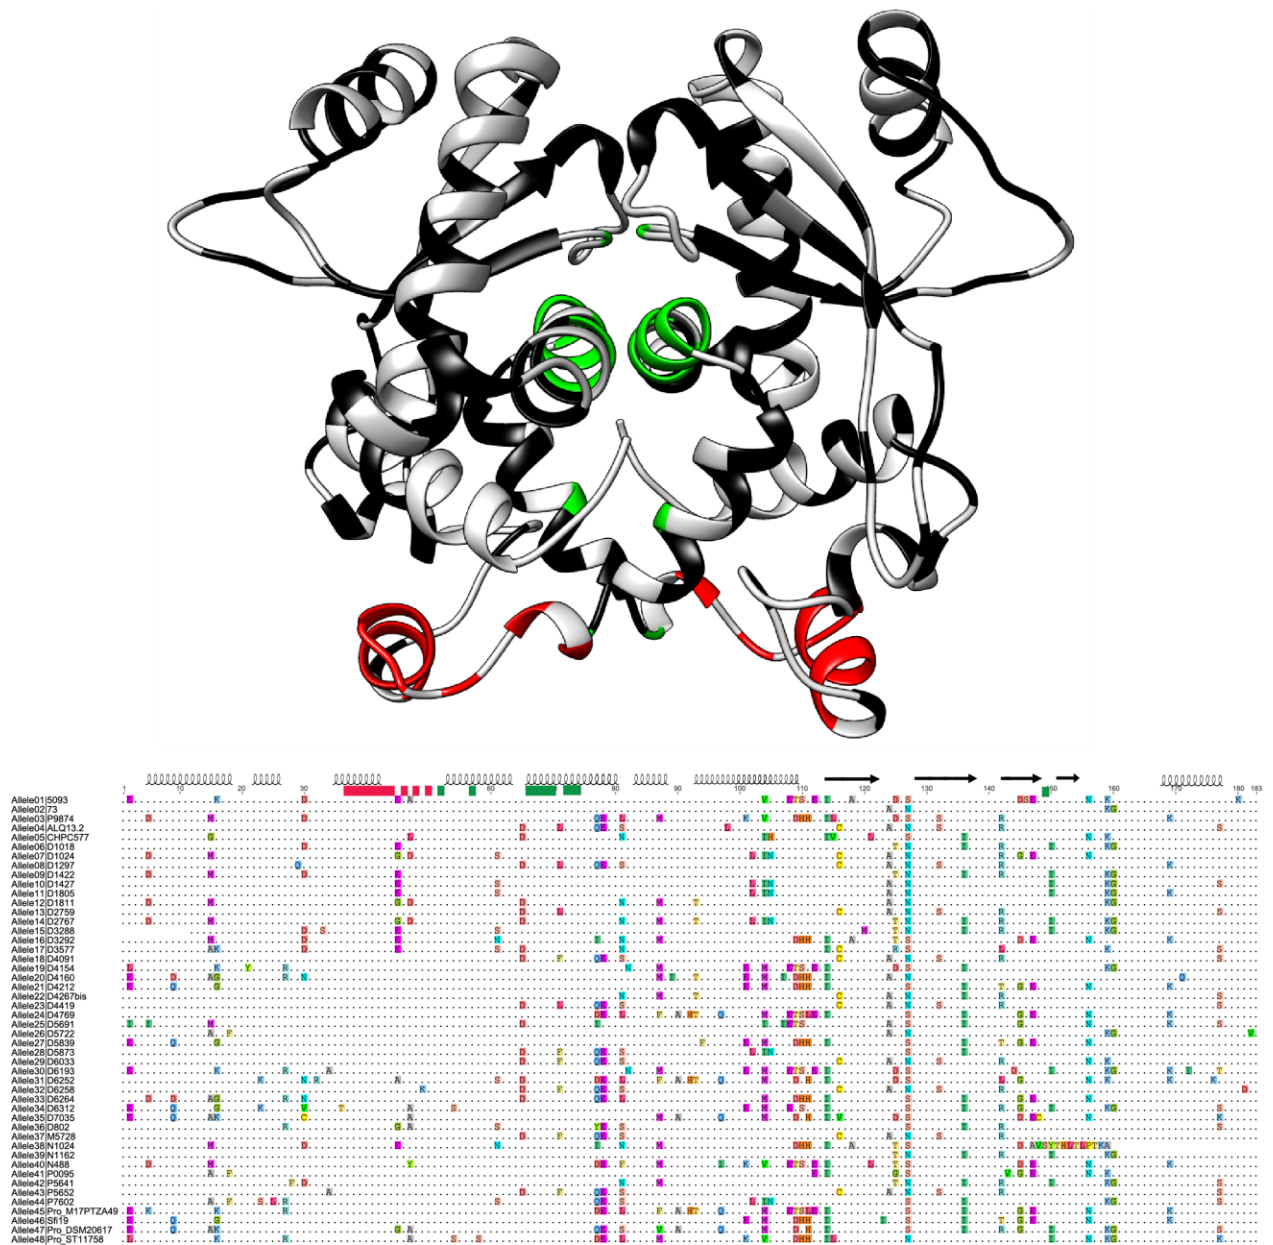

**Supplementary Fig. 1. Sequence conservation for 48 different alleles of AcrIIA6.** (Top) The sequence conservation in 48 alleles of AcrIIA6 mapped onto the structure of the dimer. Each Allele is identified with a number and the name of the phage it was found following the vertical bar. Residues are white if not 100% conserved, and black, red (HTH DNA-binding interface) or green (dimerization interface) if conserved. (Bottom) Alignment of all 48 alleles of AcrIIA6 using Geneious v7.1<sup>1</sup>, with residues coloured by amino acid similarity. A dot (.) indicates identity to the consensus sequence (not depicted). Loops indicate  $\alpha$ -helical residues, black arrows indicate  $\beta$ -strands, as represented by ESPrpt<sup>2</sup>. The red and green boxes above the alignment correspond to the colouring visible on the structure (Top).



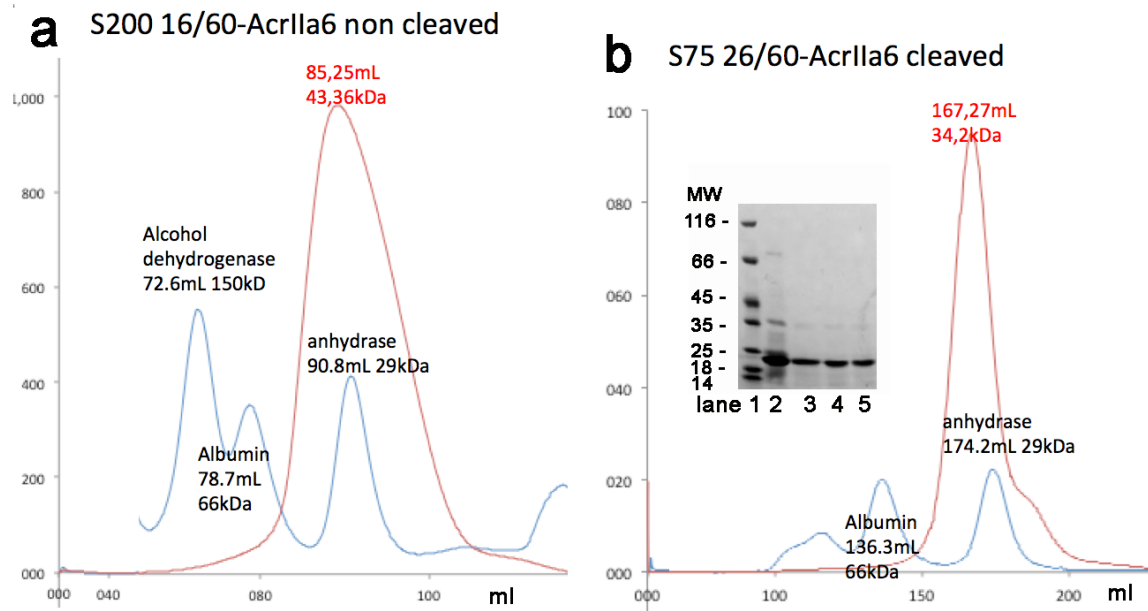

**Supplementary Fig. 3. Size exclusion chromatography of the His<sub>6</sub>-Trx-TEV-AcrIIA6 construct.** (a) before cleavage (column S200 16/60) and (b) after cleavage (column S75 26/60). The fusion construct His<sub>6</sub>-Trx-TEV-AcrIIA6 migrates as a monomer (theoretical MW: 36.1 kDa) while AcrIIA6 migrates as a dimer at ~40 kDa (theoretical MW of the monomer: 21.7 kDa), as judged from calibration curves. Inset: SDS gel of cleaved product. Lanes 1: molecular weight markers in kDa. Lane 2: output of the affinity column. Lanes 3-5: output of the SEC column. The AcrIIA6 monomer molecular weight is ~22 kDa.

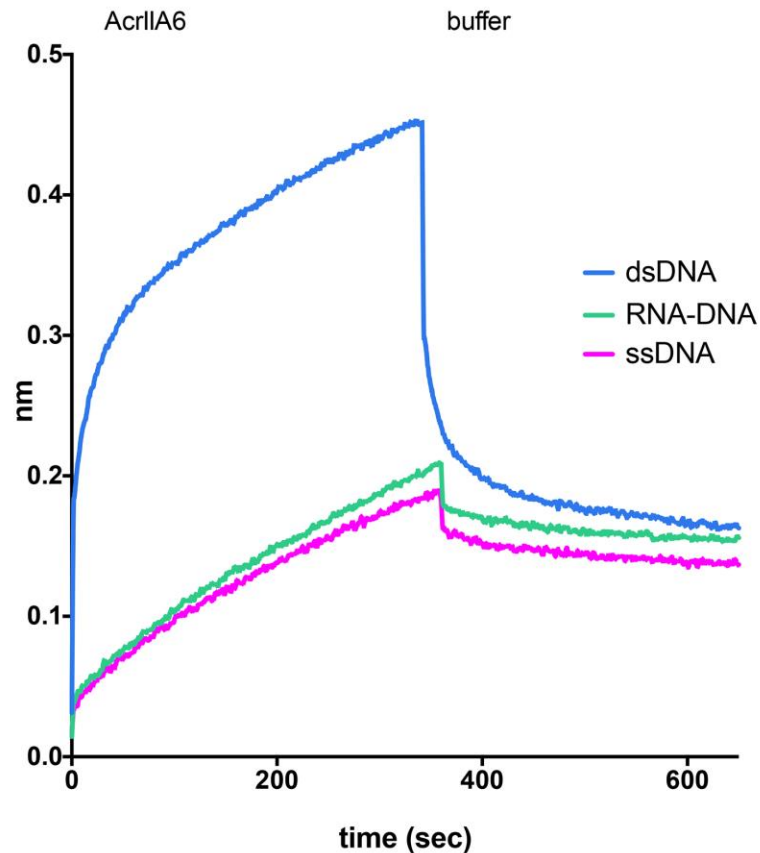

**Supplementary Fig. 4. Binding assays between AcrIIA6 and oligonucleotides using Bio-Layer Interferometry.** Biotinylated dsDNA, RNA-DNA heteroduplex and ssDNA of similar sequences were immobilized on streptavidin-coated biosensors and dipped into 6  $\mu$ M of AcrIIA6. The AcrIIA6 and buffer labels indicate the association and dissociation steps, respectively.

**A**

|               |                      |              |        |                   |                    |     |
|---------------|----------------------|--------------|--------|-------------------|--------------------|-----|
|               | 1                    | 10           | 20     | 30                | 40                 | 50  |
| AcrIIA5_D1126 | MAYGKSRYSYRKR        | NFSISDN      | ORREYA | KKMKKE            | LEQAFENLDGWYLSSMKD |     |
| AcrIIA5_D4276 | MAYGKSRYSYRKR        | SFNRSNKN     | ORREYA | QEMDR             | LEKAFENLDGWYLSSMKD |     |
|               | 60                   | 70           | 80     | 90                | 100                |     |
| AcrIIA5_D1126 | SAYKDFGKYEIRLSNHSADN | RYHDLNENGR   | LIVN   | VKASKLNFVDIIENKLG |                    |     |
| AcrIIA5_D4276 | SAYKDFGKYEIRLSNHSADN | KYHDLNENGR   | LIVN   | VKASKLNFVDIIENKLD |                    |     |
|               | 110                  | 120          | 130    | 140               |                    |     |
| AcrIIA5_D1126 | KIIEKID              | LDLDKYRFINAT | KLER   | DIRCYKGV          | KTKK               | DVI |
| AcrIIA5_D4276 | KIIEKID              | LDLDKYRFINAT | NLEH   | DIRCYKGV          | KTKR               | EVI |

**B**

|               |           |            |                 |                |                |            |     |
|---------------|-----------|------------|-----------------|----------------|----------------|------------|-----|
|               |           | $\alpha 1$ |                 | $\alpha 2$     |                | $\alpha 3$ |     |
| AcrIIA6_D1811 | 1         | 10         | 20              | 30             | 40             | 50         |     |
| AcrIIA6_D1811 | MKIND     | DIKELILEY  | MSRYFKFENDFYKLP | GIKFTDANWQFKNG | GT             | DI         | IEK |
| AcrIIA6_D1024 | MKIND     | DIKELILEY  | MSRYFKFENDFYKLP | GIKFTDANWQFKNG | GT             | DI         | IEK |
| AcrIIA6_DT1   | MKIN      | NDIKELILEY | VSRYPKFENDFYKLP | GIKFTDANWQFKNG | ET             | S          | IEK |
|               | 60        | 70         | 80              | 90             | 100            |            |     |
| AcrIIA6_D1811 | MGAARVNAM | LDC        | CLFDD           | DFELAMIGKAQTNY | YNDNSL         | KMNMPFY    | TY  |
| AcrIIA6_D1811 | MGAARVNAM | LDC        | CLFDD           | DFELAMIGKAQTNY | YNDNSL         | KLNMPFY    | AY  |
| AcrIIA6_DT1   | MGAARVNAM | LDC        | CLFDD           | DFELAMIGKAQTNY | YNDNSL         | KLNMPFY    | AY  |
|               | 110       | 120        | 130             | 140            | 150            |            |     |
| AcrIIA6_D1811 | QQLL      | KWLKNNR    | DDVI            | GTGRMYTASGN    | YIANAYLEVALESS | RLG        | SGS |
| AcrIIA6_D1811 | QQLL      | KWLKNNR    | DDVI            | GTGRMYTASGN    | YIANAYLEVALESS | RLG        | SGS |
| AcrIIA6_DT1   | QQLL      | LNWLKNNR   | DDVI            | GTGRMYTASGN    | YIANAYLEVALESS | RLG        | SGS |
|               | 160       | 170        | 180             |                |                |            |     |
| AcrIIA6_D1811 | QMRFK     | DYSK       | GQEP            | IPSGR          | QNRLEWIENN     | LENIR      |     |
| AcrIIA6_D1024 | QMRFK     | NYSR       | SQEP            | IPSGR          | QNRLEWIENN     | LENIR      |     |
| AcrIIA6_DT1   | QMRFK     | DYSK       | GQEP            | IPSGR          | KNRLEWIENN     | LENIR      |     |

**Supplementary Fig. 5. Amino acid alignment of the AcrIIAs selected for further investigation (in Figures 4 and 5). Residues numbered and highlighted according to identity (black), similarity (bolded & black outline), or difference (white) for AcrIIA5 (a) and AcrIIA6 (b). (b) The secondary structure of the associated residues in AcrIIA6<sub>D1811</sub> are depicted above (large loop =  $\alpha$ -helix, small loop " $\eta$ " =  $3_{10}$ -helix, arrow =  $\beta$  sheet, TT = strict  $\beta$ -turns. Note  $\beta 3$ - $\beta 4$  appear as a single  $\beta 3$  sheet in Figure 3a), visualized using ESPript<sup>2</sup>.**

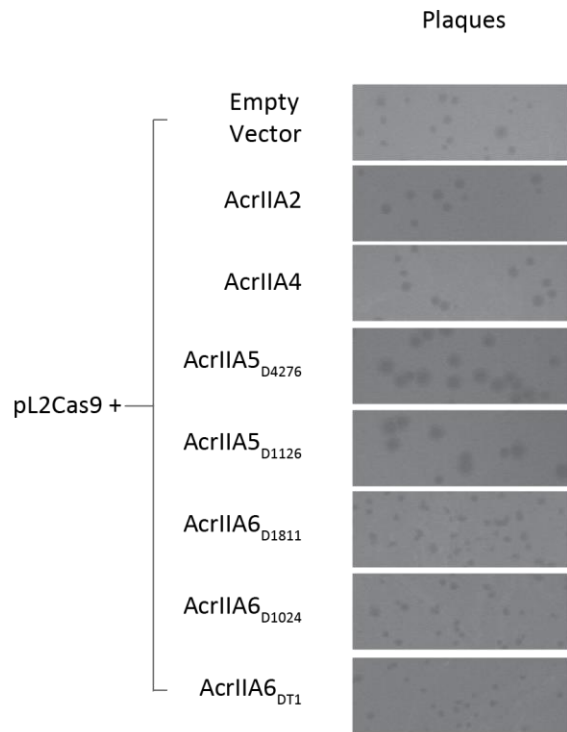

**Supplementary Fig. 6. Plaque morphologies of p2 plaques leaking-through or bypassing immunity granted by pL2Cas9 in the presence of each tested AcrIIA.** A representative section of a plate is presented (right) under identical magnification for each.

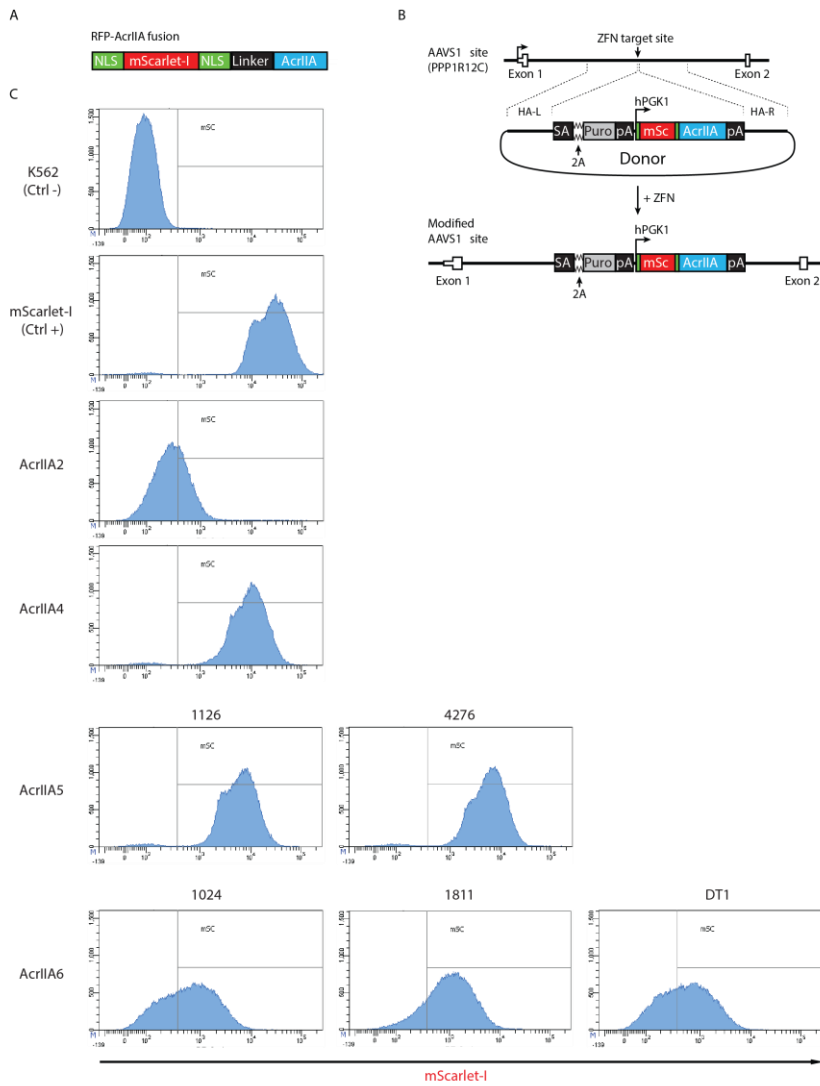

**Supplementary Fig. 7. Steady state levels of AcrIIAs expressed constitutively from the *AAVS1* safe harbor locus.** (a) Schematic of the AcrIIA protein fusions. AcrIIA ORFs were genetically fused at their N-terminus to monomeric Scarlet-I (mSc), a bright red fluorescent protein, and to nuclear localization sequences (NLS). (b) Schematic of the ZFN-driven targeted integration of mSc-AcrIIAs to the *AAVS1* locus. The first two exons of the *PPP1R12C* gene are shown as open boxes. Also annotated are the locations of the splice acceptor site (SA), 2A self-cleaving peptide sequence (2A), puromycin resistance gene (Puro), polyadenylation sequences (pA), human phosphoglycerate kinase 1 promoter (hPGK1), homology arms left and right (HA-L, HA-R) are respectively 800 and 840 bp. (c) FACS-based quantification of mSc-AcrIIA expression levels in cycling polyclonal populations of K562 cells obtained after puromycin selection.



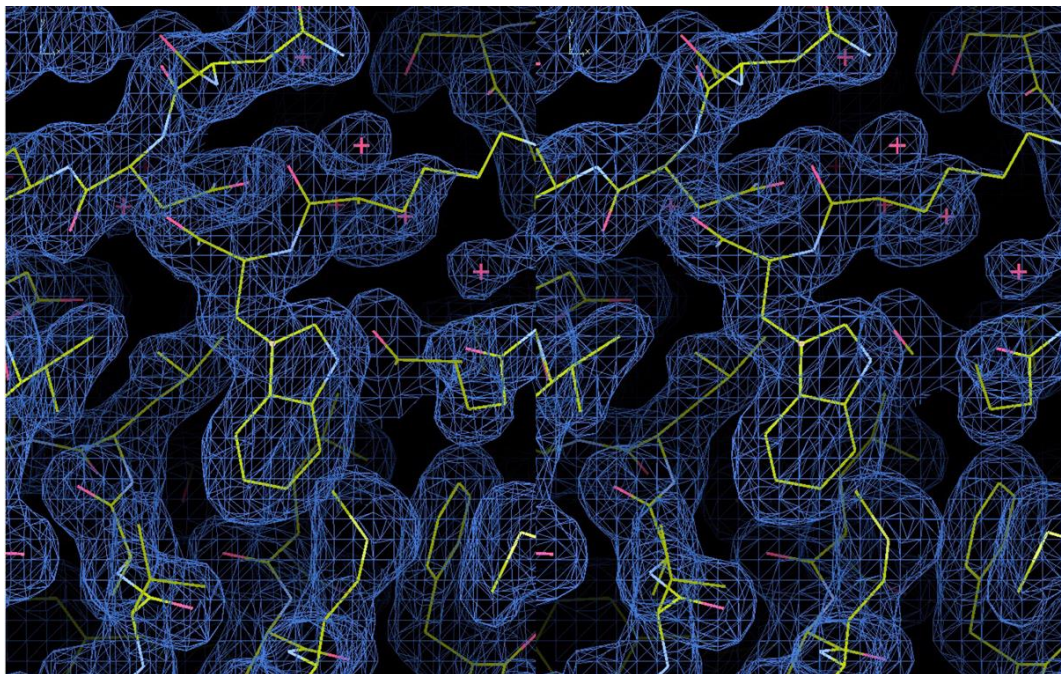

**Supplementary Fig. 8. Stereo image of a portion of the electron density map (2Fo-Fc) contoured at 1  $\sigma$  level around Trp 106 belonging to helix 7.**

**Supplementary Table 1. Data collection and refinement statistics of AcrIIA6 (values in parentheses are for highest-resolution shell).**

|                                                     | : Ta <sub>6</sub> Br <sub>12</sub> <sup>#</sup> | Cubic native                      | Tetragonal native                 |
|-----------------------------------------------------|-------------------------------------------------|-----------------------------------|-----------------------------------|
| <b>Data collection</b>                              |                                                 |                                   |                                   |
| Space group                                         | P4 <sub>3</sub> 32                              | P4 <sub>3</sub> 32                | P4 <sub>3</sub> 2 <sub>1</sub> 2  |
| <i>a</i> , <i>b</i> , <i>c</i> (Å)                  | a=b=c=175.15                                    | a=b=c=175.15                      | a=b=71.37, c=177.7                |
| $\alpha$ , $\beta$ , $\gamma$ (°)                   | $\alpha$ = $\beta$ = $\gamma$ =90               | $\alpha$ = $\beta$ = $\gamma$ =90 | $\alpha$ = $\beta$ = $\gamma$ =90 |
| Resolution (Å)                                      | 30-3.02 (3.23-3.02)*                            | 50-2.5 (2.65-2.50)*               | 50-1.96 (2.1-1.96)*               |
| <i>R</i> <sub>sym</sub>                             | 0.187 (1.54)                                    | 0.189 (1.0)                       | 0.139 (1.17)                      |
| <i>I</i> / $\sigma$ <i>I</i>                        | 16.9 (2.5)                                      | 13.3 (2.2)                        | 15.8 (3.54)                       |
| Completeness (%)                                    | 99.9 (99.9)                                     | 99.9 (99.9)                       | 99.5 (99.2)                       |
| Redundancy                                          | 35 (35)                                         | 26 (26)                           | 24 (24)                           |
| <b>Refinement</b>                                   |                                                 |                                   |                                   |
| Resolution (Å)                                      |                                                 | 48.8-2.55(2.58-2.50)              | 26.4-1.96 (1.96-2.02)             |
| No. reflections                                     |                                                 | 32398 (2946)                      | 33785 (2875)                      |
| <i>R</i> <sub>work</sub> / <i>R</i> <sub>free</sub> |                                                 | 23.2/24.5(0.31/0.31)              | 0.213/0.227(0.216/0.246)          |
| No. atoms                                           |                                                 |                                   |                                   |
| Protein                                             |                                                 | 3004                              | 2950                              |
| Ligand/ion                                          |                                                 | 0                                 | 0                                 |
| Water                                               |                                                 | 287                               | 348                               |
| <i>B</i> -factors <sup>§</sup>                      |                                                 |                                   |                                   |
| Protein                                             |                                                 | 65.0                              | 38.6                              |
| Water                                               |                                                 | 65.2                              | 49.6                              |
| R.m.s. deviations                                   |                                                 |                                   |                                   |
| Bond lengths (Å)                                    |                                                 | 0.009                             | 0.009                             |
| Bond angles (°)                                     |                                                 | 1.08                              | 1.01                              |

\* One crystal collected

# The working structure obtained from the dataset of the AcrIIa6 Ta<sub>6</sub>Br<sub>12</sub> derivative was only used for solving the higher resolution structures of the cubic and tetragonal forms by molecular replacement and was not refined nor deposited into the PDB.

§ Wilson *B*-factors are 78.1 and 37.5, respectively.

## Supplementary Table 2. List of strains, plasmids and primers.

| Strains      | Description                                                             | Function                                    | Source     |
|--------------|-------------------------------------------------------------------------|---------------------------------------------|------------|
| NEB5α        | <i>Escherichia coli</i> competent cells                                 | Cloning                                     | NEB        |
| Rosetta pLYS | <i>Escherichia coli</i> competent cells                                 | Cloning for overexpression                  | Novagen    |
| DGCC7854     | <i>Streptococcus thermophilus</i> , Host to 4 phages, CR1 adaptive      | Amplification of 4 phages (Fig 1,2)         | (3)        |
| SMQ-1343     | DGCC7854, CR1-programmed vs 4 phages                                    | Finding an ACR-containing phage (Fig 1)     | (3)        |
| SMQ-1344     | DGCC7854 (pNZ123) CmR                                                   | Control for ACR activity (Fig 1)            | (3)        |
| SMQ-1345     | SMQ-1343 (pNZ123) CmR                                                   | Control for ACR activity (Fig 1)            | (3)        |
| SMQ-1359     | NEB5α (pNZAcrlIA2), CmR                                                 | Source of plasmid pNZAcrlIA2                | This study |
| SMQ-1360     | NEB5α (pNZAcrlIA4), CmR                                                 | Source of plasmid pNZAcrlIA4                | This study |
| SMQ-1361     | NEB5α (pNZAcrl-1811), CmR                                               | Source of plasmid pNZAcrl-1811              | This study |
| SMQ-1362     | NEB5α (pNZAcrl-1024), CmR                                               | Source of plasmid pNZAcrl-1024              | This study |
| SMQ-1363     | NEB5α (pNZAcrl-DT1), CmR                                                | Source of plasmid pNZAcrl-DT1               | This study |
| SMQ-1364     | NEB5α (pNZAcrl-1126), CmR                                               | Source of plasmid pNZAcrl-1126              | This study |
| SMQ-1365     | DGCC7854 (pNZAcrl-1811) CmR                                             | Control for ACR activity (Fig 1)            | This study |
| SMQ-1366     | SMQ-1343 (pNZAcrl-1811) CmR                                             | Test for ACR activity (Fig 1)               | This study |
| DGCC7710     | <i>S. thermophilus</i> , host to 2972, model for CR1 and CR3 adaptation | Sub-Cloning (next eight strains)            | (4)        |
| SMQ-1339     | DGCC7710 (pNZ123), CmR                                                  | Control for ACR activity (Fig 3)            | (5)        |
| SMQ-1367     | DGCC7710 (pNZAcrlIA2), CmR                                              | Control for ACR activity (Fig 3)            | This study |
| SMQ-1368     | DGCC7710 (pNZAcrlIA4), CmR                                              | Control for ACR activity (Fig 3)            | This study |
| SMQ-1349     | DGCC7710 (pNZAcrl-4276), CmR                                            | Control for ACR activity (Fig 3)            | (3)        |
| SMQ-1369     | DGCC7710 (pNZAcrl-1126), CmR                                            | Control for ACR activity (Fig 3)            | This study |
| SMQ-1370     | DGCC7710 (pNZAcrl-1811), CmR                                            | Control for ACR activity (Fig 3)            | This study |
| SMQ-1371     | DGCC7710 (pNZAcrl-1024), CmR                                            | Control for ACR activity (Fig 3)            | This study |
| SMQ-1372     | DGCC7710 (pNZAcrl-DT1), CmR                                             | Control for ACR activity (Fig 3)            | This study |
| SMQ-1335b    | DGCC7710 w/CR1 spacer targeting 2972                                    | Sub-Cloning (next eight strains)            | (5)        |
| SMQ-1350     | SMQ-1335b (pNZ123), CmR                                                 | Control for ACR activity (Fig 3)            | (3)        |
| SMQ-1373     | SMQ-1335b (pNZAcrlIA2), CmR                                             | Test for ACR activity vs CR1 (Fig 3)        | This study |
| SMQ-1374     | SMQ-1335b (pNZAcrlIA4), CmR                                             | Test for ACR activity vs CR1 (Fig 3)        | This study |
| SMQ-1351     | SMQ-1335b (pNZAcrl-4276), CmR                                           | Test for ACR activity vs CR1 (Fig 3)        | (3)        |
| SMQ-1375     | SMQ-1335b (pNZAcrl-1126), CmR                                           | Test for ACR activity vs CR1 (Fig 3)        | This study |
| SMQ-1376     | SMQ-1335b (pNZAcrl-1811), CmR                                           | Test for ACR activity vs CR1 (Fig 3)        | This study |
| SMQ-1377     | SMQ-1335b (pNZAcrl-1024), CmR                                           | Test for ACR activity vs CR1 (Fig 3)        | This study |
| SMQ-1378     | SMQ-1335b (pNZAcrl-DT1), CmR                                            | Test for ACR activity vs CR1 (Fig 3)        | This study |
| SMQ-1338     | DGCC7710 w/CR3 spacer targeting 2972                                    | Sub-Cloning (next eight strains)            | (3)        |
| SMQ-1352     | SMQ-1338 (pNZ123), CmR                                                  | Control for ACR activity (Fig 3)            | (3)        |
| SMQ-1379     | SMQ-1338 (pNZAcrlIA2), CmR                                              | Test for ACR activity vs CR3 (Fig 3)        | This study |
| SMQ-1380     | SMQ-1338 (pNZAcrlIA4), CmR                                              | Test for ACR activity vs CR3 (Fig 3)        | This study |
| SMQ-1353     | SMQ-1338 (pNZAcrl-4276), CmR                                            | Test for ACR activity vs CR3 (Fig 3)        | (3)        |
| SMQ-1381     | SMQ-1338 (pNZAcrl-1126), CmR                                            | Test for ACR activity vs CR3 (Fig 3)        | This study |
| SMQ-1382     | SMQ-1338 (pNZAcrl-1811), CmR                                            | Test for ACR activity vs CR3 (Fig 3)        | This study |
| SMQ-1383     | SMQ-1338 (pNZAcrl-1024), CmR                                            | Test for ACR activity vs CR3 (Fig 3)        | This study |
| SMQ-1384     | SMQ-1338 (pNZAcrl-DT1), CmR                                             | Test for ACR activity vs CR3 (Fig 3)        | This study |
| MG1363       | <i>L. lactis</i> , host to phage p2                                     | Sub-Cloning (next sixteen strains)          | (6)        |
| SMQ-1354     | MG1363 (pNZ123, pL2Cas9), CmR, EmR                                      | Control for SpCas9 activity (Fig 3)         | (3)        |
| SMQ-1385     | MG1363 (pNZAcrlIA2, pL2Cas9), CmR, EmR                                  | Control for SpCas9 activity (Fig 3)         | This study |
| SMQ-1386     | MG1363 (pNZAcrlIA4, pL2Cas9), CmR, EmR                                  | Control for SpCas9 activity (Fig 3)         | This study |
| SMQ-1355     | MG1363 (pNZAcrl-4276, pL2Cas9), CmR, EmR                                | Control for SpCas9 activity (Fig 3)         | (3)        |
| SMQ-1387     | MG1363 (pNZAcrl-1126, pL2Cas9), CmR, EmR                                | Control for SpCas9 activity (Fig 3)         | This study |
| SMQ-1388     | MG1363 (pNZAcrl-1811, pL2Cas9), CmR, EmR                                | Control for SpCas9 activity (Fig 3)         | This study |
| SMQ-1389     | MG1363 (pNZAcrl-1024, pL2Cas9), CmR, EmR                                | Control for SpCas9 activity (Fig 3)         | This study |
| SMQ-1390     | MG1363 (pNZAcrl-DT1, pL2Cas9), CmR, EmR                                 | Control for SpCas9 activity (Fig 3)         | This study |
| SMQ-1356     | MG1363 (pNZ123, pL2Cas9-44), CmR, EmR                                   | Control for SpCas9 activity (Fig 3)         | (3)        |
| SMQ-1391     | MG1363 (pNZAcrlIA2, pL2Cas9-44), CmR, EmR                               | Test for SpCas9 activity (Fig 3)            | This study |
| SMQ-1392     | MG1363 (pNZAcrlIA4, pL2Cas9-44), CmR, EmR                               | Test for SpCas9 activity (Fig 3)            | This study |
| SMQ-1357     | MG1363 (pNZAcrl-4276, pL2Cas9-44), CmR, EmR                             | Test for SpCas9 activity (Fig 3)            | (3)        |
| SMQ-1393     | MG1363 (pNZAcrl-1126, pL2Cas9-44), CmR, EmR                             | Test for SpCas9 activity (Fig 3)            | This study |
| SMQ-1394     | MG1363 (pNZAcrl-1811, pL2Cas9-44), CmR, EmR                             | Test for SpCas9 activity (Fig 3)            | This study |
| SMQ-1395     | MG1363 (pNZAcrl-1024, pL2Cas9-44), CmR, EmR                             | Test for SpCas9 activity (Fig 3)            | This study |
| SMQ-1396     | MG1363 (pNZAcrl-DT1, pL2Cas9-44), CmR, EmR                              | Test for SpCas9 activity (Fig 3)            | This study |
| SMQ-1397     | NEB5α (pDONR-AcrlIA6), KanR                                             | Source of AcrlIA6 to subclone into pETG-20A | This study |
| SMQ-1398     | Rosetta pLYS (pETG-20A-AcrlIA6), AmpR                                   | Overexpression or AcrlIA6-D1811             | This study |

| Phages           | Description                                                                                     | Collection ID, GB Accession                                                                       | Source     |
|------------------|-------------------------------------------------------------------------------------------------|---------------------------------------------------------------------------------------------------|------------|
| D5842            | virulent <i>cos</i> -type phage of <i>S. thermophilus</i> DGCC7854, CRISPR-sensitive            | GB: MH000602                                                                                      | (3)        |
| D1024            | virulent <i>cos</i> -type phage of <i>S. thermophilus</i> DGCC7854, CRISPR 'impeded adaptation' | GB: MH000603                                                                                      | (3)        |
| D4276            | virulent <i>cos</i> -type phage of <i>S. thermophilus</i> DGCC7854, CRISPR-resistant            | GB: MF161328                                                                                      | (3)        |
| D1811            | virulent <i>cos</i> -type phage of <i>S. thermophilus</i> DGCC7854, CRISPR-resistant            | GB: MH000604                                                                                      | This study |
| DT1              | virulent <i>cos</i> -type phage of <i>S. thermophilus</i> SMQ-301                               | GB: AF085222                                                                                      | (7)        |
| 2972             | virulent <i>pac</i> -type phage of <i>S. thermophilus</i> DGCC7710                              | GB: AY699705                                                                                      | (8)        |
| D1126            | virulent <i>pac</i> -type phage of <i>S. thermophilus</i> DGCC7710                              |                                                                                                   | This study |
| p2               | virulent <i>cos</i> -type phage of <i>L. lactis</i> MG1363                                      | GB: GQ979703                                                                                      | (9)        |
| Plasmids         | Description                                                                                     | Function                                                                                          | Source     |
| pNZ123           | Native vector, encodes chloramphenicol resistance                                               | Negative control                                                                                  | (10)       |
| AcrlIA2          | pUC57 with AcrlIA2 synthesis construct, AcrlIA5 RBS                                             | Template used to amplify AcrlIA2 for subcloning                                                   | BioBasic   |
| AcrlIA4          | pUC57 with AcrlIA4 synthesis construct, AcrlIA5 RBS                                             | Template used to amplify AcrlIA4 for subcloning                                                   | BioBasic   |
| pNZAcrlIA2       | pNZ123 with AcrlIA2 insert in the XbaI cut site                                                 | anti-CRISPR AcrlIA2 expression                                                                    | This study |
| pNZAcrlIA4       | pNZ123 with AcrlIA4 insert in the XbaI cut site                                                 | anti-CRISPR AcrlIA4 expression                                                                    | This study |
| pNZAcrl-4276     | pNZ123 with D4276_g28 insert in the XbaI cut site                                               | anti-CRISPR AcrlIA6 <sub>D4276</sub> expression                                                   | (3)        |
| pNZAcrl-1126     | pNZ123 with AcrlIA5-D1126 insert in the XbaI cut site                                           | anti-CRISPR AcrlIA6 <sub>D1126</sub> expression                                                   | This study |
| pNZAcrl-1811     | pNZ123 with D1811_g26 insert in the XbaI cut site                                               | anti-CRISPR AcrlIA6 <sub>D1811</sub> expression                                                   | This study |
| pNZAcrl-1024     | pNZ123 with D1024_g29 insert in the XbaI cut site                                               | anti-CRISPR AcrlIA6 <sub>D1024</sub> expression                                                   | This study |
| pNZAcrl-DT1      | pNZ123 with DT1_g27 insert in the XbaI cut site                                                 | anti-CRISPR AcrlIA6 <sub>DT1</sub> expression                                                     | This study |
| pL2Cas9          | SpCas9 from pCas9 on a pTRK12 backbone, for use in <i>L. lactis</i>                             | Negative control                                                                                  | (11)       |
| pL2Cas9-44       | pL2Cas9 with PS44 and PS_44_RC ligated into the BsaI cut site                                   | Confer resistance against phage p2                                                                | (3)        |
| pDONR201         | Native vector, kanamycin resistance                                                             | Used to create the entry clone pDONR-AcrlIA6                                                      | Invitrogen |
| pDONR-AcrlIA6    | pDONR entry clone with D1811_g26 insert                                                         | Used to subclone into pETG-20A                                                                    | This study |
| pETG-20A         | Native expression vector, ampicillin resistance                                                 | Used to create the expression clone pETG-20A-AcrlIA6                                              | EMBL       |
| pETG-20A-AcrlIA6 | pETG-20A expression vector with D1811_g26 insert                                                | anti-CRISPR AcrlIA6 <sub>D1811</sub> overexpression                                               | This study |
| Oligos           | Sequence 5'-3'                                                                                  | Function                                                                                          | Source     |
| Yc70             | TGCTGAGACAACCTAGTCTCTC                                                                          | CR1 locus screening (DGCC7854)                                                                    | (12)       |
| CR1-rev          | TAAACAGAGCCTCCCTATCC                                                                            | CR1 locus screening (DGCC7854)                                                                    | (12)       |
| pNZins_F         | AATGTCACCTAACCTGCCCG                                                                            | pNZ123 insert screening                                                                           | (5)        |
| pNZins_R         | CATTGAACATGCTGAAGAGC                                                                            | pNZ123 insert screening                                                                           | (5)        |
| GibsonUp_F       | ATTACAGCTCCAGATCCAGTACTGAATTCT                                                                  | pNZAcrlIA2 and pNZAcrlIA4 constructions                                                           | This study |
| GibsonDown_R     | GAATAATATGCACCTCGAGAAGCTTGAGCTCT                                                                | pNZAcrlIA2 and pNZAcrlIA4 constructions                                                           | This study |
| D1126_ACR_F      | <u>ATTACAGCTCCAGATCCAGTACTGAATTCT</u> CTGAAAAAGTTGGGAAGTAGCT                                    | pNZAcrl-1126 construction                                                                         | This study |
| D1126_ACR_R      | <u>GAAAAATATGCACCTCGAGAAGCTTGAGCTCT</u> TAACACCAAGTTTGTCTTTCTAAAT                               | pNZAcrl-1126 construction                                                                         | This study |
| D1811_g26_F      | <u>ATTACAGCTCCAGATCCAGTACTGAATTCT</u> TCGCTGAAAAAGTTGGGAAGT                                     | pNZAcrl-1811 and pNZAcrl-1024 constructions                                                       | This study |
| D1811_g26_R      | <u>GAAAAATATGCACCTCGAGAAGCTTGAGCTCT</u> CTCTCTCTTATGATAGCTTGCCA                                 | pNZAcrl-1811 and pNZAcrl-1024 constructions                                                       | This study |
| DT1_g27_F        | <u>ATTACAGCTCCAGATCCAGTACTGAATTCT</u> ATCATCGCTGAAAAAGCTTTGGA                                   | pNZAcrl-DT1 construction                                                                          | This study |
| DT1_g27_R        | <u>GAAAAATATGCACCTCGAGAAGCTTGAGCTCT</u> TGTATCCATTGTTTTTACCTCGTTT                               | pNZAcrl-DT1 construction                                                                          | This study |
| GWF_AcrlIA6      | <u>GGGGACAAGTTTGTACAAAAAAGCAGGCT</u> TAGAAAACCTGTACTCCAGGGTAAAAATAAATGACGACATCAA                | pDONR-1811 construction and screening                                                             | This study |
| GWR_AcrlIA6      | <u>GGGGACCACTTTGTACAAGAAAGCTGGGTCTTATTA</u> TCGAATGTTTTTCGAGAT                                  | pDONR-1811 construction and screening                                                             | This study |
| sequence         | Description                                                                                     | GB accession                                                                                      | Source     |
| AcrlIA5-D1126    | RBS region: TAATTAAGAAAGAAAGGAAGTAAAA + D1126_AcrlIA5                                           | D1126_AcrlIA5 GB: MH000605                                                                        | This study |
| AcrlIA2          | AcrlIA5 RBS region: TTAAGAAAGAAAGGAAGTAAAA + AcrlIA2                                            | AcrlIA2 GB: CP002001.1 locus_tag: LMOG_03147                                                      | (13)       |
| AcrlIA4          | AcrlIA5 RBS region: TTAAGAAAGAAAGGAAGTAAAA + AcrlIA4 codon optimized (residue R33 CGC → CGA)    | AcrlIA4 GB: CP002001.1 locus_tag: LMOG_02993<br>[https://www.ncbi.nlm.nih.gov/nuccore/CP002001.1] | (13)       |

underline : Extensions used for Gibson or Gateway cloning

### Supplementary Table 3. SpCas9 and St1Cas9 spacer (guide) sequences.

| Target               | Sequence 5'-3'        |
|----------------------|-----------------------|
| SpCas9 <i>EMXI</i>   | GAGTCCGAGCAGAAGAAGAA  |
| SpCas9 <i>FANCF</i>  | GGAATCCCCTTCTGCAGCACC |
| SpCas9 <i>RUNX1</i>  | GCATTTTTCAGGAGGAAGCGA |
| St1Cas9 <i>EMXI</i>  | GAAGGGCCTGAGTCCGAGCA  |
| St1Cas9 <i>FANCF</i> | GTAGGTAGTGCTTGAGACCG  |
| St1Cas9 <i>RUNX1</i> | GAGGTATCCAGCAGAGGGGA  |

**Supplementary Table 4. AcrIIA Gblocks.**

| Gblock                | Sequence 5'-3'                                                                                                                                                                                                                                                                                                                                                                                                                                                                                                                                                                                                                                   |
|-----------------------|--------------------------------------------------------------------------------------------------------------------------------------------------------------------------------------------------------------------------------------------------------------------------------------------------------------------------------------------------------------------------------------------------------------------------------------------------------------------------------------------------------------------------------------------------------------------------------------------------------------------------------------------------|
| AcrIIA2 <sup>24</sup> | GAATTCC <u>TGTACA</u> AAGAAAAGGCCGGCGGCCACGAAAAAGGCCGGCCAG<br>GCAAAAAAGAAAAAGGGCGGAGGCTCTGGCGGCCGGAAGC <u>GCGGCCGC</u><br>CATGACGCTGACCCGCGCTCAGAAAAAATACGCCGAGGCGATGCATG<br>AGTTTATCAATATGGTTGATGACTTTGAAGAATCAACGCCTGACTTTGC<br>AAAAGAGGTTCTGCACGACTCCGACTATGTGGTCATTACAAAAACGA<br>GAAATATGCCGTGGCACTCTGTAGTCTCTCCACAGATGAATGTGAGTA<br>CGATACTAACTTGTATTTGGATGAAAAGCTCGTCGATTACAGCACAGT<br>TGATGTCAACGGAGTGACATATTACATCAATATAGTGGAACAAATGA<br>CATAGATGATCTTGAAATTGCGACCGACGAGGACGAGATGAAGTCTGG<br>AAACCAAGAGATTATTCTTAAGTCCGAAGTGA*TAA*CTCGAGT<br>CTAGACGTTTAAACCCTGCAGGCTGTG                                                                  |
| AcrIIA4 <sup>24</sup> | GAATTCC <u>TGTACA</u> AAGAAAAGGCCGGCGGCCACGAAAAAGGCCGGCCAG<br>GCAAAAAAGAAAAAGGGCGGAGGCTCTGGCGGCCGGAAGC <u>GCGGCCGC</u><br>CATGAACATTAACGACCTCATAACGAGAGATTAAGAACAAGATTACAC<br>CGTCAAACCTGTCAGGAACTGATAGTAACTCAATCACCCAGCTTATTAT<br>CAGGGTAAACAATGATGGGAATGAATATGTGATATCTGAGAGCGAAA<br>ACGAGTCTATCGTCGAGAAATTCATTTCCGCTTTTAAAGAACGGGTGGA<br>ATCAGGAATATGAGGATGAAGAAGAATTTTACAATGACATGCAGACG<br>ATCACGTTGAAAAGTGAAGTGAAGTGA*TAA*CTCGAGTCTAGACGTTT<br>AAACCCTGCAGGCTGTG                                                                                                                                                                             |
| AcrIIA5<br>D1126      | GAATTCC <u>TGTACA</u> AAGAAAAGGCCGGCGGCCACGAAAAAGGCCGGCCAG<br>GCAAAAAAGAAAAAGGGCGGAGGCTCTGGCGGCCGGAAGC <u>GCGGCCGC</u><br>CATGGCCTATGGTAAAAGTAGGTATAACTCCTATCGCAAACGCAACTT<br>CAGCATCTCTGACAATCAAAGGAGAGAATACGCAAAGAAAATGAAGG<br>AACTTGAACAGGCATTTGAGAACCTCGACGGATGGTACTTGAGTAGCA<br>TGAAAGATTCTGCGTATAAGGATTTTCGGTAAGTACGAAATCCGACTTT<br>CAAATCACTCAGCCGACAATCGCTATCATGACCTGGAGAACGGCCGCT<br>TGATCGTGAATGTGAAAGCAAGCAAACCTTAACTTTGTCGATATTATCG<br>AGAATAAACTCGGCAAGATCATCGAAAAAATTGATACCCTGGACCTTG<br>ATAAATATCGCTTCATCAATGCGACCAAGCTGGAGAGGGACATTAAGT<br>GCTACTATAAAGGGTATAAGACTAAGAAAGACGTTATCTGA*TAA*CTC<br>GAGTCTAGACGTTTAAACCCTGCAGGCTGTG  |
| AcrIIA5<br>D4276      | GAATTCC <u>TGTACA</u> AAGAAAAGGCCGGCGGCCACGAAAAAGGCCGGCCAG<br>GCAAAAAAGAAAAAGGGCGGAGGCTCTGGCGGCCGGAAGC <u>GCGGCCGC</u><br>CATGGCCTATGGTAAAAGTAGGTATAACTCCTATCGCAAACGCTCTTTC<br>AACAGGTCTAACAAACAAAGGAGAGAATACGCACAGGAAATGGACCG<br>CCTTGAAAAGGCATTTGAGAACCTCGACGGATGGTACTTGAGTAGCAT<br>GAAAGATTCTGCGTATAAGGATTTTCGGTAAGTACGAAATCCGACTTTC<br>AAATCACTCAGCCGACAATAAATATCATGACCTGGAGAACGGCCGCTT<br>GATCGTGAATATCAAAGCAAGCAAACCTTAACTTTGTCGATATTATCGA<br>GAATAAACTCGACAAGATCATCGAAAAAATTGATAAGCTGGACCTTGA<br>TAAATATCGCTTCATCAATGCGACCAACCTGGAGCACGACATTAAGTG<br>CTACTATAAAGGGTTTAAAGACTAAGAAAGAGGTTATCTGA*TAA*CTCG<br>AGTCTAGACGTTTAAACCCTGCAGGCTGTG |
| AcrIIA6<br>D1024      | GAATTCC <u>TGTACA</u> AAGAAAAGGCCGGCGGCCACGAAAAAGGCCGGCCAG<br>GCAAAAAAGAAAAAGGGCGGAGGCTCTGGCGGCCGGAAGC <u>GCGGCCGC</u><br>CATGAAGATCAACGACGACATAAAGGAATTGATCCTCGAATACATGTC<br>CCGATATTTTAAATTCGAGAATGACTTCTATAAACTGCCGGGAATCAA                                                                                                                                                                                                                                                                                                                                                                                                                   |

|                  |                                                                                                                                                                                                                                                                                                                                                                                                                                                                                                                                                                                                                                                                                                                                                                                                                      |
|------------------|----------------------------------------------------------------------------------------------------------------------------------------------------------------------------------------------------------------------------------------------------------------------------------------------------------------------------------------------------------------------------------------------------------------------------------------------------------------------------------------------------------------------------------------------------------------------------------------------------------------------------------------------------------------------------------------------------------------------------------------------------------------------------------------------------------------------|
|                  | <p>ATTTACCGATGCTAACTGGCAGAAGTTCAAAAATGGGGGGACTGATAT<br/> CGAGAAGATGGGGGCGGCCAGGGTGAATGCGATGCTTTCATGTCTCTT<br/> CGAAGACTTCGAGTTGGCAATGATTGGAAAAGCCCAAATACTATTA<br/> TATTGACAATTCTCTCAAGCTTAATATGCCATTTTACGCTTATTACGAC<br/> ATGTTTAAAAGCAGTTGCTTATTAAGTGGCTGAAAAATAATCGCGAC<br/> GACGTTATTTGCGGCACGGGTAGGATGTATACTGCGTCAGGGAAGTAT<br/> ATTGCAAACGCGTACCTGGAGGTGGCTCTGGAGTCTAGCCGACTGGGC<br/> GGTGGAGAGTATATGCTTCAGATGCGCTTCAAAAATTATAGTCGCAGT<br/> CAAGAGCCTATCCCATCAGGACGACAGAACCGACTTGAATGGATCGAA<br/> AACAACTTTGAGAACATCCGGTGA*TAA*CTCGAGTCTAGACGTTTAAA<br/> CCCTGCAGGCTGTG</p>                                                                                                                                                                                                                                     |
| AcrIIA6<br>D1811 | <p>GAATTCC<u>TGTACA</u>AAGAAAAGGCCGGCGGCCACGAAAAAGGCCGGCCAG<br/> GCAAAAAGAAAAGGGCGGAGGCTCTGGCGGCGGAAGC<u>GCGGCCGC</u><br/> CATGAAGATCAACGACGACATAAAGGAATTGATCCTCGAATACATGTC<br/> CCGATATTTTAAATTCGAGAATGACTTCTATAAACTGCCGGGAATCAA<br/> ATTTACCGATGCTAACTGGCAGAAGTTCAAAAATGGGGGGACTGATAT<br/> CGAGAAGATGGGGGCGGCCAGGGTGAATGCGATGCTTGATTGTCTCTT<br/> CGATGACTTCGAGTTGGCAATGATTGGAAAAGCCCAAATACTATTA<br/> TAATGACAATTCTCTCAAGATGAATATGCCATTTTACACTTATTACGAC<br/> ATGTTTAAAAGCAGCAACTTCTCAAGTGGCTGAAAAATAATCGCGAC<br/> GACGTTATTGGCGGCACGGGTAGGATGTATACTGCGTCAGGGAAGTAT<br/> ATTGCAAACGCGTACCTGGAGGTGGCTCTGGAGTCTAGCTCACTGGGC<br/> TCAGGAAGCTATATGCTTCAGATGCGCTTCAAAGATTATAGTAAAGGA<br/> CAAGAGCCTATCCCATCAGGACGACAGAACCGACTTGAATGGATCGAA<br/> AACAACTTTGAGAACATCCGGTGA*TAA*CTCGAGTCTAGACGTTTAAA<br/> CCCTGCAGGCTGTG</p> |
| AcrIIA6 DT1      | <p>GAATTCC<u>TGTACA</u>AAGAAAAGGCCGGCGGCCACGAAAAAGGCCGGCCAG<br/> GCAAAAAGAAAAGGGCGGAGGCTCTGGCGGCGGAAGC<u>GCGGCCGC</u><br/> CATGAAGATCAACAACGACATAAAGGAATTGATCCTCGAATACGTGTC<br/> CCGATATTTTAAATTCGAGAATGACTTCTATAAACTGCCGGGAATCAA<br/> ATTTACCGATGCTAACTGGCAGAAGTTCAAAAATGGGGAAACTTCCAT<br/> CGAGAAGATGGGGGCGGCCAGGGTGAATGCGATGCTTTCATGTCTCTT<br/> CGAAGACTTCGAGTTGGCAATGATTGGAAAAGCCCAAATACTATTA<br/> TATTGACAATTCTCTCAAGCTTAATATGCCATTTTACGCTTATTACGAC<br/> ATGTTTAAAAGCAGTTGCTTATTAAGTGGCTGAAAAATAATCGCGAC<br/> GACGTTATTGGCGGCACGGGTAGGATGTATACTGCGTCAGGGAAGTAT<br/> ATTGCAAACGCGTACCTGGAGGTGGCTCTGGAGTCTAGCTCACTGGGC<br/> TCAGGAAGCTATATGATACAGATGCGCTTCAAAGATTATAGTAAAGGA<br/> CAAGAGCCTATCCCATCAGGACGAAAGAACCGACTTGAATGGATCGA<br/> AACAACTTTGAGAACATCCGGTGA*TAA*CTCGAGTCTAGACGTTTAA<br/> ACCCTGCAGGCTGTG</p>  |

Restriction sites: *BsrGI* (TGTACA) to make mScarlet-I fusions; *NotI* (GCGGCCGC) for untagged constructs

Nucleophosmin NLS

(GGGS)<sub>2</sub> linker

AcrIIA ORF

TGA\*TAA\* Stop codons

**Supplementary Table 5. PCR primers used for Surveyor assays.**

| Target               | Primer                    |
|----------------------|---------------------------|
| <i>EMXI</i> Forward  | CCATCCCCTTCTGTGAATGT      |
| <i>EMXI</i> Reverse  | GGAGATTGGAGACACGGAGA      |
| <i>FANCF</i> Forward | GGGCCGGGAAAGAGTTGCTG      |
| <i>FANCF</i> Reverse | GCCCTACATCTGCTCTCCCTCC    |
| <i>RUNXI</i> Forward | CCAGCACAACTTACTCGCACTTGAC |
| <i>RUNXI</i> Reverse | CATCACCAACCCACAGCCAAGG    |

## Supplementary References

1. Kearse, M. *et al.* Geneious Basic : an integrated and extendable desktop software platform for the organization and analysis of sequence data. *Bioinformatics* **28**(12), 1647-1649 (2012).
2. Gouet, P., Courcelle, E., Stuart, D. I. & Metz, F. ESPript: analysis of multiple sequence alignments in PostScript. *Bioinformatics* **15**, 305–308 (1999).
3. Hynes, A. P. *et al.* An anti-CRISPR from a virulent streptococcal phage inhibits *Streptococcus pyogenes* Cas9. *Nat Microbiol* (2017). doi:10.1038/s41564-017-0004-7
4. Barrangou, R. *et al.* CRISPR provides acquired resistance against viruses in prokaryotes. *Science* **315**, 1709–1712 (2007).
5. Hynes, A. P., Labrie, S. J. & Moineau, S. Programming native CRISPR arrays for the generation of targeted immunity. *MBio* **7**, e00202-16 (2016).
6. Gasson, M. J. Plasmid complements of *Streptococcus lactis* NCDO 712 and other lactic streptococci after protoplast-induced curing. *J Bacteriol* **154**, 1–9 (1983).
7. Tremblay, D. M. & Moineau, S. Complete genomic sequence of the lytic bacteriophage DT1 of *Streptococcus thermophilus*. *Virology* **255**, 63–76 (1999).
8. Lévesque, C. *et al.* Genomic organization and molecular analysis of virulent bacteriophage 2972 infecting an exopolysaccharide-producing *Streptococcus thermophilus* strain. *Appl Env. Microbiol* **71**, 4057–4068 (2005).
9. Higgins, D. L., Sanozky-Dawes, R. B. & Klaenhammer, T. R. Restriction and modification activities from *Streptococcus lactis* ME2 are encoded by a self-transmissible plasmid,



- pTN20, that forms cointegrates during mobilization of lactose-fermenting ability. *J Bacteriol* **170**, 3435–3442 (1988).
10. De Vos, W. M. Gene cloning and expression in lactic streptococci. *FEMS Microbiol Lett* **46**, 281–295 (1987).
  11. Lemay, M.-L., Tremblay, D. M. & Moineau, S. Genome engineering of virulent lactococcal phages using CRISPR-Cas9. *ACS Synth Biol* (2017).  
doi:10.1021/acssynbio.6b00388
  12. Horvath, P. *et al.* Diversity, activity, and evolution of CRISPR loci in *Streptococcus thermophilus*. *J Bacteriol* **190**, 1401–1412 (2008).
  13. Rauch, B. J. *et al.* Inhibition of CRISPR-Cas9 with bacteriophage proteins. *Cell* **168**, 150–158.e10 (2017).
